# Supplementary material for: Comparative efficacy and safety of immune checkpoint inhibitor-related therapies for advanced melanoma: a Bayesian network analysis
Source: PubMed Central journal article supplement (PMC5663542; doi:10.18632/oncotarget.18906), 2017-07-01
Supplement: oncotarget-08-83637-s001.pdf [file oncotarget-08-83637-s001.pdf]

# Comparative efficacy and safety of immune checkpoint inhibitor-related therapies for advanced melanoma: a Bayesian network analysis

## SUPPLEMENTARY MATERIALS

### Search strategy

#### Pubmed:

("Melanoma"[Mesh]) AND (((((((anti PD-L1[Title/Abstract]) OR atezolizumab[Title/Abstract]) OR durvalumab[Title/Abstract]) OR avelumab[Title/Abstract]) OR BMS-986016[Title/Abstract])) OR (((anti PD-1[Title/Abstract]) OR nivolumab[Title/Abstract]) OR pembrolizumab[Title/Abstract]) OR pidilizumab[Title/Abstract])) OR (((anti CTLA4[Title/Abstract]) OR anti CTLA-4[Title/Abstract]) OR ipilimumab[Title/Abstract]) OR tremelimumab[Title/Abstract]))

#### Cochrane Library:

#1 anti PD-L1:ti,ab,kw or atezolizumab or durvalumab or avelumab or BMS-986016 (Word variations have been searched)

#2 anti PD-1:ti,ab,kw or nivolumab:ti,ab,kw or pembrolizumab:ti,ab,kw or pidilizumab:ti,ab,kw (Word variations have been searched)

#3 anti CTLA4:ti,ab,kw or anti CTLA-4:ti,ab,kw or ipilimumab:ti,ab,kw or tremelimumab:ti,ab,kw (Word variations have been searched)

#4 MeSH descriptor: [Melanoma] explode all trees

#5 #1 or #2 or #3

#6 #4 and #5

#### Web of science

#1 Topic: (anti CTLA4) OR Topic: (anti CTLA-4) OR Topic: (ipilimumab) OR Topic: (tremelimumab)

#2 Topic: (anti PD-1) OR Topic: (nivolumab) OR Topic: (pembrolizumab) OR Topic: (pidilizumab)

#3 Topic: (anti PD-L1) OR Topic: (atezolizumab) OR Topic: (durvalumab) OR Topic: (avelumab) OR Topic: (BMS-986016)

#4 Topic: (Melanoma)

#5 #1 OR #2 OR #3

#6 #5 AND #4

#### ClinicalTrials.gov:

Category: "Melanoma, Studies With Results" (<http://clinicaltrials.gov/>)

|                           | Random sequence generation (selection bias) | Allocation concealment (selection bias) | Blinding of participants and personnel (performance bias) | Blinding of outcome assessment (detection bias) | Incomplete outcome data (attrition bias) | Selective reporting (reporting bias) | Other bias |
|---------------------------|---------------------------------------------|-----------------------------------------|-----------------------------------------------------------|-------------------------------------------------|------------------------------------------|--------------------------------------|------------|
| Hersh 2011                | +                                           | +                                       | -                                                         | -                                               | +                                        | +                                    | +          |
| Hodi 2010                 | +                                           | +                                       | +                                                         | +                                               | +                                        | +                                    | +          |
| Hodi 2014                 | +                                           | +                                       | ?                                                         | ?                                               | +                                        | +                                    | +          |
| Larkin 2015               | +                                           | +                                       | +                                                         | +                                               | +                                        | +                                    | +          |
| Postow 2015               | +                                           | +                                       | +                                                         | +                                               | +                                        | +                                    | +          |
| Ribas 2013                | +                                           | +                                       | -                                                         | -                                               | +                                        | +                                    | +          |
| Ribas 2015                | +                                           | +                                       | +                                                         | +                                               | +                                        | +                                    | +          |
| Robert 2011               | +                                           | +                                       | +                                                         | +                                               | +                                        | +                                    | +          |
| Robert 2015 (NCT01721772) | +                                           | +                                       | +                                                         | +                                               | +                                        | +                                    | +          |
| Robert 2015 (NCT01866319) | +                                           | +                                       | ?                                                         | ?                                               | +                                        | +                                    | +          |
| Weber 2009                | +                                           | +                                       | +                                                         | +                                               | +                                        | +                                    | +          |
| Weber 2015                | +                                           | +                                       | -                                                         | -                                               | +                                        | +                                    | +          |

Supplementary Figure 1: Cochrane risk of bias tool assessment.

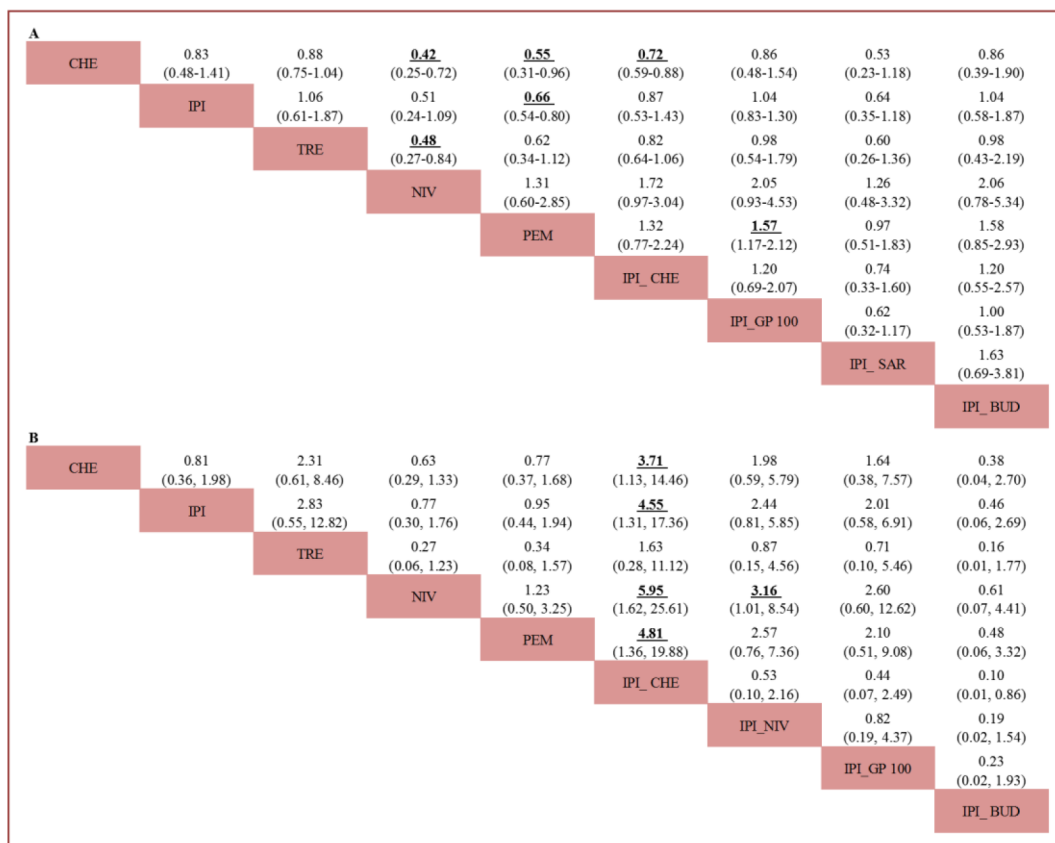

**Supplementary Figure 2: Pooled hazard ratios for overall survival (A) and pooled odds ratios for overall adverse events (B) by Bayesian network meta-analysis.** The column treatment is compared with the row treatment. For overall survival, HRs lower than 1 favour the column-defining treatment. For overall adverse events, ORs lower than 1 favour the column-defining treatment. Numbers in parentheses indicate 95% credible intervals. Significant results are in bold and underlined. CHE = chemotherapy. IPI = ipilimumab. TRE = tremelimumab. NIV = nivolumab. PEM = pembrolizumab. IPI\_CHE = ipilimumab plus chemotherapy. IPI\_NIV = ipilimumab followed by nivolumab. IPI\_GP100 = ipilimumab plus glycoprotein 100. IPI\_SAR = ipilimumab plus sargramostim. IPI\_BUD = ipilimumab plus budesonide.

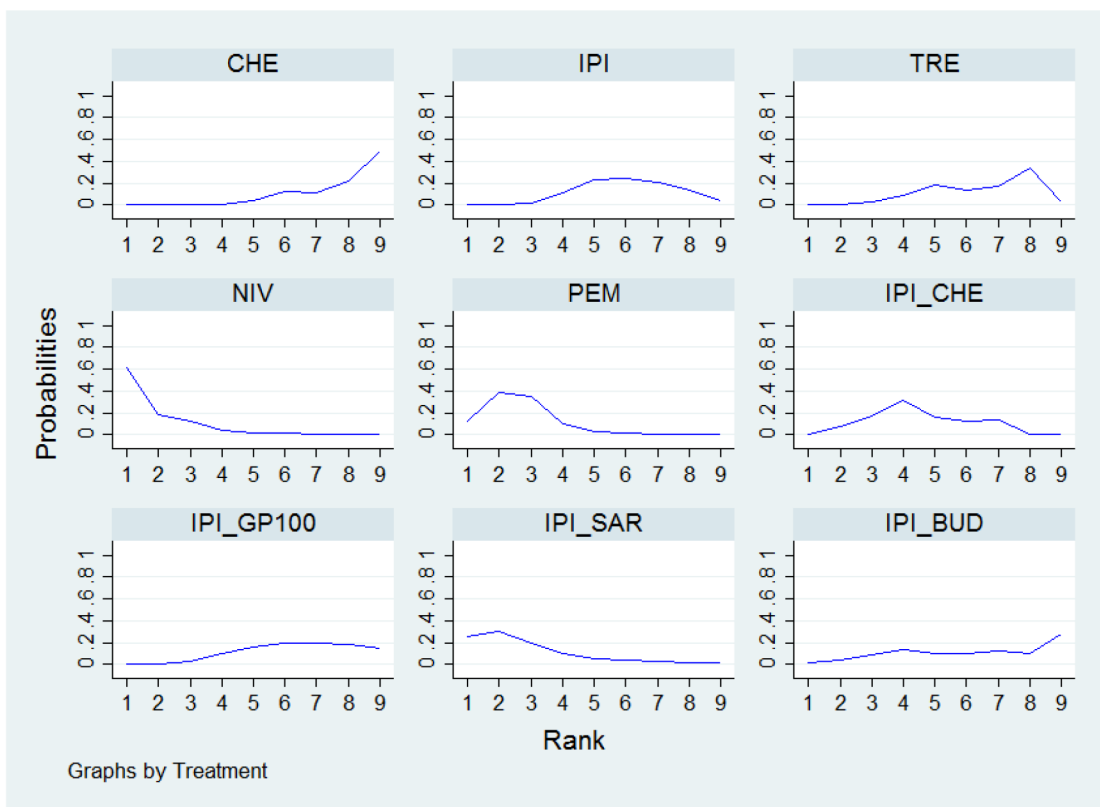

**Supplementary Figure 3: Ranking of treatments in terms of overall survival benefit.** Ranking indicates the probability to be the best treatment, the second best, the third best, and so on, among the 9 immune checkpoint inhibitor-related treatments. CHE = chemotherapy. IPI = ipilimumab. TRE = tremelimumab. NIV = nivolumab. PEM = pembrolizumab. IPI\_CHE = ipilimumab plus chemotherapy. IPI\_GP100 = ipilimumab plus glycoprotein 100. IPI\_SAR = ipilimumab plus sargramostim. IPI\_BUD = ipilimumab plus budesonide.

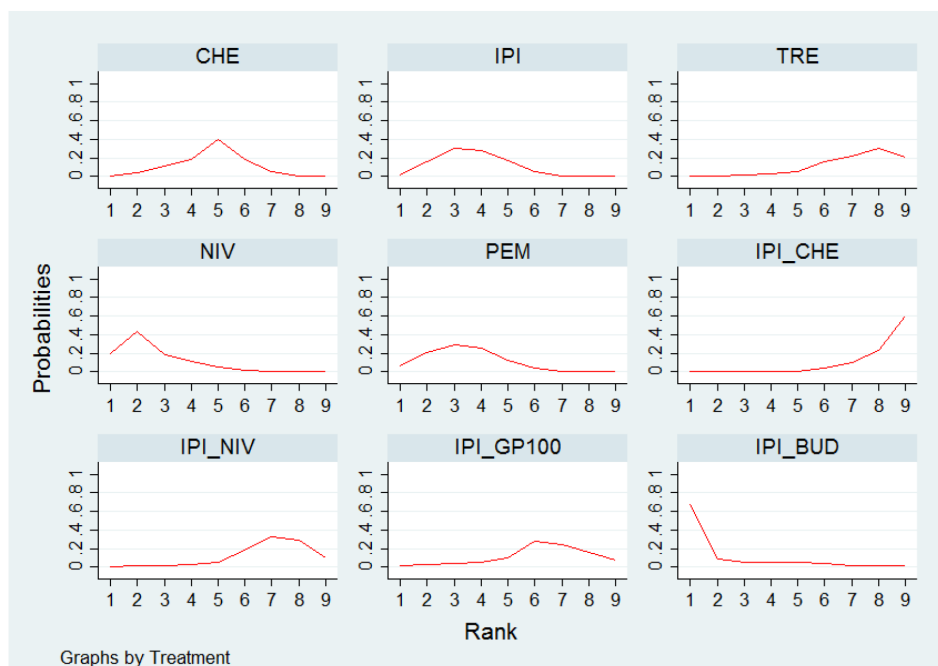

**Supplementary Figure 4: Ranking of treatments in terms of overall adverse events.** Ranking indicates the probability to be the best treatment, the second best, the third best, and so on, among the 9 immune checkpoint inhibitor-related treatments. CHE = chemotherapy. IPI = ipilimumab. TRE = tremelimumab. NIV = nivolumab. PEM = pembrolizumab. IPI\_CHE = ipilimumab plus chemotherapy. IPI\_NIV = ipilimumab followed by nivolumab. IPI\_GP100 = ipilimumab plus glycoprotein 100. IPI\_BUD = ipilimumab plus budesonide.

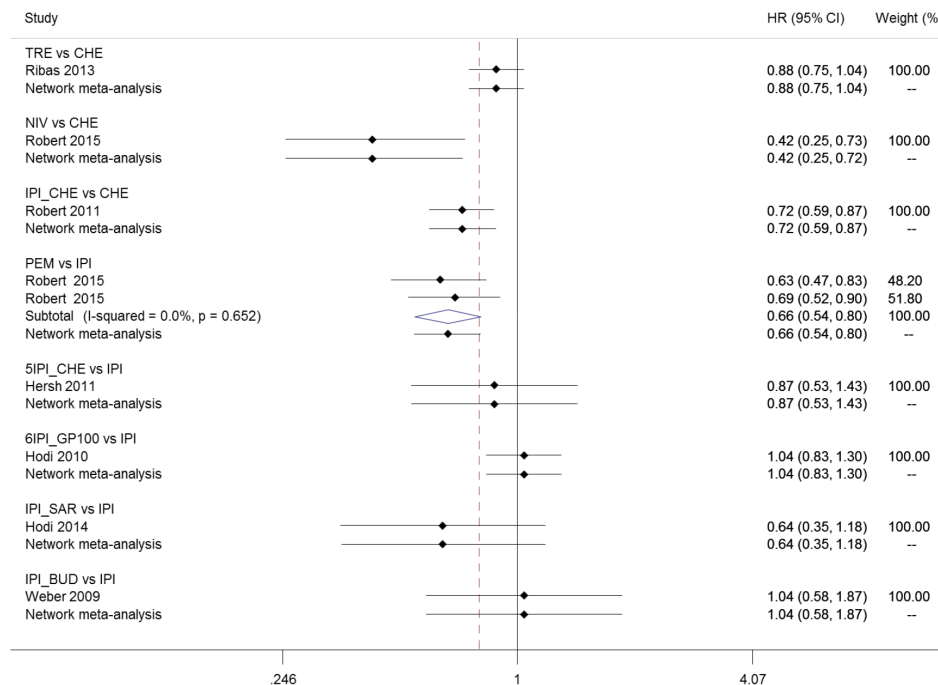

**Supplementary Figure 5: Pooled hazard ratios for overall survival by Bayesian network-analysis and traditional meta-analysis.** HR = hazard ratio. CI=confidence interval for traditional meta-analysis and credible interval for Bayesian network meta-analysis. CHE = chemotherapy. IPI = ipilimumab. TRE = tremelimumab. NIV = nivolumab. PEM = pembrolizumab. IPI\_CHE = ipilimumab plus chemotherapy. IPI\_GP100 = ipilimumab plus glycoprotein 100. IPI\_BUD = ipilimumab plus budesonide. IPI\_SAR = ipilimumab plus sargramostim.

**Supplementary Table 1: High-grade adverse event- Evaluation of inconsistency by using nodesplit approach (all p-values >0.05)**

| Comparison     | Direct Effect        | Indirect Effect     | Overall              | P-Value |
|----------------|----------------------|---------------------|----------------------|---------|
| CHE vs NIV     | -1.01 (-1.84, -0.18) | -0.78 (-2.16, 0.75) | -0.95 (-1.54, -0.33) | 0.72    |
| CHE vs PEM     | -0.94 (-1.82, -0.07) | -0.77 (-2.16, 0.72) | -0.91 (-1.50, -0.28) | 0.82    |
| CHE vs IPI_CHE | 1.24 (0.20, 2.24)    | 0.40 (-1.35, 2.18)  | 1.11 (0.22, 1.83)    | 0.37    |
| IPI vs NIV     | -0.66 (-1.74, 0.46)  | -0.89 (-2.23, 0.36) | -0.72 (-1.43, -0.05) | 0.71    |
| IPI vs PEM     | -0.63 (-1.47, 0.20)  | -0.78 (-2.30, 0.57) | -0.68 (-1.29, -0.09) | 0.82    |
| IPI vs IPI_CHE | 0.73 (-0.80, 2.27)   | 1.58 (0.33, 2.82)   | 1.34 (0.31, 2.14)    | 0.37    |
| NIV vs IPI_NIV | 1.87 (0.73, 2.96)    | 2.06 (0.58, 3.69)   | 1.90 (1.18, 2.74)    | 0.79    |

Numbers in parentheses indicate 95% credible intervals. CHE = chemotherapy. IPI = ipilimumab. TRE = tremelimumab. NIV = nivolumab. PEM = pembrolizumab. IPI\_CHE = ipilimumab plus chemotherapy. IPI\_GP100 = ipilimumab plus glycoprotein 100. IPI\_BUD = ipilimumab plus budesonide. IPI\_SAR = ipilimumab plus sargramostim.

**Supplementary Table 2: Overall adverse event- Nodesplit approach for assessment of inconsistency (all p-values >0.05)**

| Comparison     | Direct Effect       | Indirect Effect     | Overall             | P-Value |
|----------------|---------------------|---------------------|---------------------|---------|
| CHE vs NIV     | -0.33 (-1.31, 0.62) | -0.98 (-2.70, 0.83) | -0.47 (-1.24, 0.29) | 0.4     |
| CHE vs PEM     | -0.52 (-1.39, 0.35) | 0.38 (-0.93, 1.99)  | -0.26 (-1.00, 0.52) | 0.19    |
| CHE vs IPI_CHE | 1.75 (0.06, 3.73)   | 0.75 (-1.29, 2.82)  | 1.31 (0.12, 2.67)   | 0.42    |
| IPI vs NIV     | -0.37 (-1.62, 0.95) | 0.15 (-1.50, 1.47)  | -0.26 (-1.21, 0.56) | 0.5     |
| IPI vs PEM     | 0.18 (-0.67, 1.01)  | -0.77 (-2.38, 0.64) | -0.05 (-0.83, 0.66) | 0.18    |
| IPI vs IPI_CHE | 1.06 (-0.67, 2.90)  | 2.05 (0.10, 4.21)   | 1.52 (0.27, 2.85)   | 0.42    |
| NIV vs IPI_NIV | 1.51 (0.48, 2.65)   | -0.26 (-2.18, 1.61) | 1.15 (0.01, 2.14)   | 0.09    |

Numbers in parentheses indicate 95% credible intervals. CHE = chemotherapy. IPI = ipilimumab. TRE = tremelimumab. NIV = nivolumab. PEM = pembrolizumab. IPI\_CHE = ipilimumab plus chemotherapy. IPI\_NIV = ipilimumab followed by nivolumab.

**Supplementary Table 3: Comparison of hazard ratios (95% CI) for progression-free survival from fixed and random models**

| Treatment compared with CHE | Fixed Model             | Random Model           |
|-----------------------------|-------------------------|------------------------|
| IPI                         | 0.91 (0.73-1.14)        | 0.92(0.62-1.40)        |
| TRE                         | <b>0.55 (0.39-0.77)</b> | <b>0.55(0.33-0.92)</b> |
| NIV                         | <b>0.45 (0.36-0.57)</b> | <b>0.47(0.34-0.74)</b> |
| PEM                         | <b>0.53 (0.45-0.63)</b> | <b>0.53(0.39-0.72)</b> |
| IPI_CHE                     | <b>0.76 (0.63-0.92)</b> | 0.76(0.49-1.19)        |
| IPI_NIV                     | <b>0.35 (0.24-0.50)</b> | <b>0.35(0.22-0.62)</b> |
| IPI_GP100                   | 1.09 (0.83-1.42)        | 1.09(0.61-2.01)        |
| IPI_SAR                     | 0.80 (0.55-1.16)        | 0.80(0.43-1.53)        |
| DIC                         | -5.75                   | -3.778                 |

Numbers in parentheses indicate 95% credible intervals. CHE = chemotherapy. IPI = ipilimumab. TRE = tremelimumab. NIV = nivolumab. PEM = pembrolizumab. IPI\_CHE = ipilimumab plus chemotherapy. IPI\_NIV = ipilimumab followed by nivolumab. IPI\_GP100 = ipilimumab plus glycoprotein 100. IPI\_SAR = ipilimumab plus sargramostim. Bold type font indicates significant values.

**Supplementary Table 4: Comparison of hazard ratios (95% CI) for overall survival from fixed and random models**

| Treatment compared with CHE | Fixed Model             | Random Model        |
|-----------------------------|-------------------------|---------------------|
| IPI                         | 0.83 (0.48-1.41)        | 0.82 (0.0007-96.69) |
| TRE                         | 0.88 (0.75-1.04)        | 0.88 (0.014-37.28)  |
| NIV                         | <b>0.42 (0.25-0.72)</b> | 0.42 (0.007-26.64)  |
| PEM                         | <b>0.55 (0.31-0.96)</b> | 0.54 (0.0002-107.8) |
| IPI_CHE                     | <b>0.72 (0.59-0.88)</b> | 0.71 (0.006-24.58)  |
| IPI_GP100                   | 0.86 (0.48-1.54)        | 0.86 (0.0003-827.4) |
| IPI_BUD                     | 0.86 (0.39-1.90)        | 0.85 (0.0004-448.9) |
| IPI_SAR                     | 0.53 (0.23-1.18)        | 0.53 (0.0002-266.6) |
| DIC                         | 0.9121                  | 2.332               |

Numbers in parentheses indicate 95% credible intervals. CHE = chemotherapy. IPI = ipilimumab. TRE = tremelimumab. NIV = nivolumab. PEM = pembrolizumab. IPI\_CHE = ipilimumab plus chemotherapy. IPI\_NIV = ipilimumab followed by nivolumab. IPI\_GP100 = ipilimumab plus glycoprotein 100. IPI\_BUD = ipilimumab plus budesonide. IPI\_SAR = ipilimumab plus sargramostim. Bold type font indicates significant values.

**Supplementary Table 5: Comparison of odds ratios (95% CI) for high-grade adverse event from consistency and inconsistency models**

| Treatment compared with CHE       | Consistency Model        | Inconsistency Model      |
|-----------------------------------|--------------------------|--------------------------|
| IPI                               | 0.79 (0.42, 1.64)        | 0.78 (0.34, 1.84)        |
| TRE                               | 1.86 (0.75, 4.40)        | 1.86 (0.65, 5.20)        |
| NIV                               | <b>0.39 (0.21, 0.72)</b> | <b>0.38 (0.19, 0.78)</b> |
| PEM                               | <b>0.40 (0.22, 0.75)</b> | <b>0.41 (0.20, 0.84)</b> |
| IPI_CHE                           | <b>3.04 (1.24, 6.22)</b> | <b>3.07 (1.12, 7.29)</b> |
| IPI_NIV                           | <b>2.62 (1.17, 6.51)</b> | 2.49 (0.93, 7.44)        |
| IPI_GP100                         | 0.57 (0.19, 1.88)        | 0.55 (0.14, 2.16)        |
| IPI_BUD                           | 1.11 (0.32, 4.07)        | 1.08 (0.25, 4.91)        |
| IPI_SAR                           | 0.46 (0.14, 1.57)        | 0.46 (0.12, 1.90)        |
| Random Effects Standard Deviation | 0.27 (0.01, 0.91)        | 0.33 (0.04, 1.07)        |
| Inconsistency Standard Deviation  | NA                       | 0.45 (0.02, 1.64)        |

Numbers in parentheses indicate 95% credible intervals. CHE = chemotherapy. IPI = ipilimumab. TRE = tremelimumab. NIV = nivolumab. PEM = pembrolizumab. IPI\_CHE = ipilimumab plus chemotherapy. IPI\_NIV = ipilimumab followed by nivolumab. IPI\_GP100 = ipilimumab plus glycoprotein 100. IPI\_BUD = ipilimumab plus budesonide. IPI\_SAR = ipilimumab plus sargramostim. Bold type font indicates significant values.

**Supplementary Table 6: Comparison of odds ratios (95% CI) for overall adverse event from consistency and inconsistency models**

| Treatment compared with CHE       | Consistency Model         | Inconsistency Model       |
|-----------------------------------|---------------------------|---------------------------|
| IPI                               | 0.81 (0.36, 1.98)         | 0.72 (0.31, 2.14)         |
| TRE                               | 2.31 (0.61, 8.46)         | 2.20 (0.62, 8.38)         |
| NIV                               | 0.63 (0.29, 1.33)         | 0.65 (0.27, 1.35)         |
| PEM                               | 0.77 (0.37, 1.68)         | 0.72 (0.35, 1.72)         |
| IPI_CHE                           | <b>3.71 (1.13, 14.46)</b> | <b>4.10 (1.09, 17.24)</b> |
| IPI_NIV                           | 1.98 (0.59, 5.79)         | 2.30 (0.57, 7.16)         |
| IPI_GP100                         | 1.64 (0.38, 7.57)         | 1.41 (0.35, 8.11)         |
| IPI_BUD                           | 0.38 (0.04, 2.70)         | 0.32 (0.04, 2.81)         |
| Random Effects Standard Deviation | 0.41 (0.06, 1.16)         | 0.38 (0.03, 1.20)         |
| Inconsistency Standard Deviation  | NA                        | 0.74 (0.04, 1.47)         |

Numbers in parentheses indicate 95% credible intervals. CHE = chemotherapy. IPI = ipilimumab. TRE = tremelimumab. NIV = nivolumab. PEM = pembrolizumab. IPI\_CHE = ipilimumab plus chemotherapy. IPI\_NIV = ipilimumab followed by nivolumab. IPI\_GP100 = ipilimumab plus glycoprotein 100. IPI\_BUD = ipilimumab plus budesonide. Bold type font indicates significant values.



Supplementary Table 7: Comparison of results from primary analysis and sensitivity analysis for trials with a low risk of bias

| Treatment | Primary Analysis<br>PFS HR (95% CI) vs CHE | Sensitivity Analysis<br>PFS HR (95% CI) vs CHE |
|-----------|--------------------------------------------|------------------------------------------------|
| CHE       | Reference                                  | Reference                                      |
| IPI       | 0.91 (0.73-1.14)                           | 0.91 (0.73-1.13)                               |
| TRE       | <b>0.55 (0.39-0.77)</b>                    | NA                                             |
| NIV       | <b>0.45 (0.36-0.57)</b>                    | <b>0.44 (0.35-0.55)</b>                        |
| PEM       | <b>0.53 (0.45-0.63)</b>                    | <b>0.53 (0.45-0.63)</b>                        |
| IPI_CHE   | <b>0.76 (0.63-0.92)</b>                    | <b>0.76 (0.63-0.93)</b>                        |
| IPI_NIV   | <b>0.35 (0.24-0.50)</b>                    | <b>0.34 (0.23-0.49)</b>                        |
| IPI_GP100 | 1.09 (0.83-1.42)                           | 1.08 (0.83-1.41)                               |
| IPI_SAR   | 0.80 (0.55-1.16)                           | 0.79 (0.54-1.16)                               |

HR = hazard ratio. CI = confidence interval. Numbers in parentheses indicate 95% credible intervals. CHE = chemotherapy. NA=data not available. IPI = ipilimumab. TRE = tremelimumab. NIV = nivolumab. PEM = pembrolizumab. IPI\_CHE = ipilimumab plus chemotherapy. IPI\_NIV = ipilimumab followed by nivolumab. IPI\_GP100 = ipilimumab plus glycoprotein 100. IPI\_SAR = ipilimumab plus sargramostim. Bold type font indicates significant values.
